# Supplementary material for: Using Unplugged Computational Thinking to Scaffold Natural Selection Learning
Source: Oxford University Press journal article supplement (doi:10.1525/abt.2021.83.2.112), 2021-02-01
Supplement: lesson_1.zip [file lesson_1.zip]

## Antibiotic Resistance Unit

### Lesson 1. Exploration of MRSA and other Antibiotic Resistant Cases

45-90 min (Depending on length of Frontline Video.)

#### Goals for the lesson

1. Students develop a basic awareness of the problem of antibiotic resistance.
2. Students develop an interest in exploring the underlying science of antibiotic resistance.
3. Provide a context for students to learn and apply how natural selection occurs in populations.
4. Provide a context for students to review and apply the following scientific concepts:
  - a. Bacterial cell structure
  - b. Protein synthesis
  - c. Effects of gene mutations on proteins.

| Instructional Sequence                                                                                                                                                                                                                                                                                                                                                                                                                                                                                                                                                                                                                                                                                                                                                                                                                                                                                                                                                                                                                                                                                                                                                                                                                                                                                                                         | Materials                                           |
|------------------------------------------------------------------------------------------------------------------------------------------------------------------------------------------------------------------------------------------------------------------------------------------------------------------------------------------------------------------------------------------------------------------------------------------------------------------------------------------------------------------------------------------------------------------------------------------------------------------------------------------------------------------------------------------------------------------------------------------------------------------------------------------------------------------------------------------------------------------------------------------------------------------------------------------------------------------------------------------------------------------------------------------------------------------------------------------------------------------------------------------------------------------------------------------------------------------------------------------------------------------------------------------------------------------------------------------------|-----------------------------------------------------|
| Instructor presents guiding questions for the unit: <ol style="list-style-type: none"><li>1. How and why do antibiotics become useless?</li><li>2. How can what we know about antibiotics be applied to other biological issues?</li></ol>                                                                                                                                                                                                                                                                                                                                                                                                                                                                                                                                                                                                                                                                                                                                                                                                                                                                                                                                                                                                                                                                                                     | Guiding Questions and Skills Objectives<br>Handouts |
| Class watches the first 9 Minutes of the Frontline video "Hunting the Nightmare Bacteria." The segment introduces the issue with MRSA and antibiotic resistant bacteria through the story of a little girl who dies from a pan-resistant infection.<br><a href="http://www.pbs.org/wgbh/pages/frontline/hunting-the-nightmare-bacteria/">http://www.pbs.org/wgbh/pages/frontline/hunting-the-nightmare-bacteria/</a><br><br>An alternative (newer) video to generate interest could be the Frontline video "The Problem with Antibiotics." This segment investigates the growing issue of antibiotic resistance through two stories: the use of antibiotics in agriculture and the case of a resistant infection in the NIH.<br><a href="http://www.pbs.org/wgbh/pages/frontline/trouble-with-antibiotics/">http://www.pbs.org/wgbh/pages/frontline/trouble-with-antibiotics/</a>                                                                                                                                                                                                                                                                                                                                                                                                                                                              | Computer<br>Projector with speakers                 |
| Introduce need to inquire into the purpose and reliability of the source. Quickly discuss the purpose and reliability of the Frontline segment.                                                                                                                                                                                                                                                                                                                                                                                                                                                                                                                                                                                                                                                                                                                                                                                                                                                                                                                                                                                                                                                                                                                                                                                                | Knowing Your Sources<br>Handout                     |
| Students work in small groups with each person accessing a different text. The texts provide different information for a series of questions about bacteria, antibiotics, and MRSA. Students answer questions using their assigned source. Additionally, students complete a brief evaluation of each resource using their "Knowing Your Sources" handout. <ol style="list-style-type: none"><li>1. Case text (CT)-Personal account of dealing with MRSA, <i>Personal Blog</i>:<br/><a href="http://tutusandtantrums.blogspot.com/2012/02/my-experience-with-mrsa.html">http://tutusandtantrums.blogspot.com/2012/02/my-experience-with-mrsa.html</a></li><li>2. CT-Personal account of dealing with MRSA, <i>Daily Strength Support Group</i>:<br/><a href="http://www.dailystrength.org/c/Methicillin_Resistant_Staphylococcus_Aureus/forum/7578667-my-experience-ca-mrsa">http://www.dailystrength.org/c/Methicillin_Resistant_Staphylococcus_Aureus/forum/7578667-my-experience-ca-mrsa</a></li><li>3. CT-Popular media account with an embedded case, <i>USA Today</i> article:<br/><a href="http://www.usatoday.com/story/news/nation/2013/12/16/mrsa-infection-community-schools-victims-doctors/3991833/">http://www.usatoday.com/story/news/nation/2013/12/16/mrsa-infection-community-schools-victims-doctors/3991833/</a></li></ol> | MRSA Case Exploration<br>Handout                    |

|                                                                                                                                                                                                                                                                                                                                                                                                                                                                                                                                                                                                                                                                                                                                                                                                                                                                                                                                        |  |
|----------------------------------------------------------------------------------------------------------------------------------------------------------------------------------------------------------------------------------------------------------------------------------------------------------------------------------------------------------------------------------------------------------------------------------------------------------------------------------------------------------------------------------------------------------------------------------------------------------------------------------------------------------------------------------------------------------------------------------------------------------------------------------------------------------------------------------------------------------------------------------------------------------------------------------------|--|
| <ol style="list-style-type: none"> <li>4. CT-Medical website pictures and descriptions, <i>MedicineNet</i> slideshow: <a href="http://www.medicinenet.com/mrsa_picture_slideshow/article.htm">http://www.medicinenet.com/mrsa_picture_slideshow/article.htm</a></li> <li>5. Optional texts for use after individuals complete their text or if there are more than 4 students in a group <ol style="list-style-type: none"> <li>a. CDC MRSA fact sheet: <a href="http://www.cdc.gov/mrsa/community/">http://www.cdc.gov/mrsa/community/</a></li> <li>b. MRSA website-multiple personal stories: <a href="http://www.mrsaresources.com/mrsa-education/personal-mrsa-stories/">http://www.mrsaresources.com/mrsa-education/personal-mrsa-stories/</a></li> </ol> </li> </ol> <p>Once students investigate their individual sources, they share their results, filling in questions they weren't able to answer from just one source.</p> |  |
| <p>Conclude this initial investigation and exploration with a whole-class discussion. This discussion may help address additional questions students may have. Some questions to begin the discussion include:</p> <ol style="list-style-type: none"> <li>1. Why is the issue of antibiotic resistance important to us?</li> <li>2. Does anyone have personal stories about antibiotic resistant infections or MRSA?</li> <li>3. How reliable were your sources? How did you make these conclusions?</li> <li>4. What additional questions do you have about antibiotic resistance? (Class might want to write these questions down for reference as unit develops.)</li> </ol>                                                                                                                                                                                                                                                        |  |

#### Formative Assessment

Instructor will gain an understanding of what students do / don't know about MRSA, antibiotic resistance, and natural selection through the whole class discussion.

NOTE: At this point, do not use the words natural selection or evolution. The goal is for students to build a conceptual understanding without using terminology that could create bias.
