# Supplementary material for: Using Unplugged Computational Thinking to Scaffold Natural Selection Learning
Source: Oxford University Press journal article supplement (doi:10.1525/abt.2021.83.2.112), 2021-02-01

## Getting Ready in the Morning

1. Alarm goes off
2. If time  $\leq$  time to get up  
    Then get out of bed  
    Else Snooze the alarm  
    Repeat 1 and 2 until you get up
3. Drink coffee
4. Eat Breakfast; Breakfast = whatever I feel like that day
5. **Get dressed**
6. Go to school/ work
7. Repeat 1-7 if Day = Monday, Tuesday, Wednesday, Thursday, or Friday

Branching

Iteration

Variable

Method call

Iteration & Variable

## Get Dressed Method

Method algorithm

1. If weather = cold,  
    Then clothes = warm  
    Else clothes = cool
2. If shoes match clothes  
    Then put shoes on  
    Else repeat 2 until they match
3. Do hair and makeup

Branching & Variable  
Variable

Branching

Iteration

## Getting Ready in the Morning

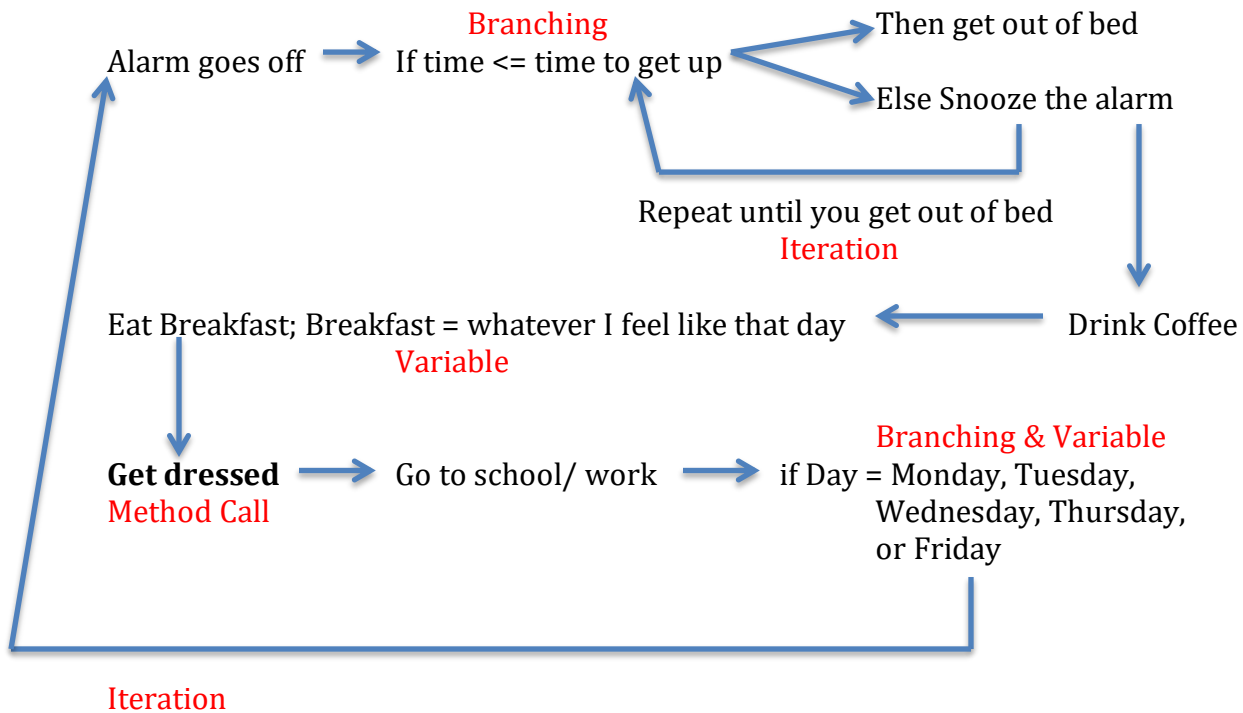

## Get Dressed Method

### Method algorithm

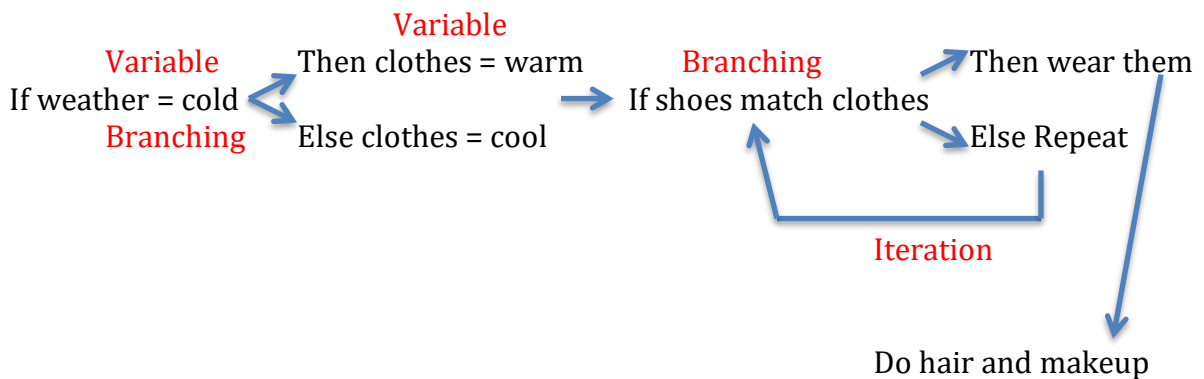

Supplement: lesson_2.zip [file lesson_2.zip]
