# Supplementary material for: Using Unplugged Computational Thinking to Scaffold Natural Selection Learning
Source: Oxford University Press journal article supplement (doi:10.1525/abt.2021.83.2.112), 2021-02-01
Supplement: lesson_2.zip [file lesson_2.zip]

Archive with 8 entries (8 files):
- CT intro.pptx
- Example Getting Ready Algorithms.pdf
- Lab Guide for Instructors.pdf
- Lesson Plan 2.pdf
- Student Lab Packet.pdf
- Antibiotics Handout.pdf
- Antibiotics.pptx
- CT Intro Video Transcript.docx
