# Supplementary material for: Using Unplugged Computational Thinking to Scaffold Natural Selection Learning
Source: Oxford University Press journal article supplement (doi:10.1525/abt.2021.83.2.112), 2021-02-01
Supplement: lesson_8.zip [file lesson_8.zip]

## **Lesson Plan 8: Policy Proposal Intro and Work**

**Time: 90 min**

### **Goals for the lesson:**

- Students learn about different social aspects of the issue of antibiotic resistance.
- Students use evidence from the lesson investigations and individual research to propose a policy for mitigating antibiotic resistance.

### **Resources/Materials:**

- Policy instruction handout
- Perspectives Jigsaw Activity Handout
- Resources handout

### **Instructional sequence**

| <b>Learning Activity</b>                                                                                                                                                                                                          | <b>Materials/Supplies</b>                               |
|-----------------------------------------------------------------------------------------------------------------------------------------------------------------------------------------------------------------------------------|---------------------------------------------------------|
| Give students the three handouts and discuss the expectations of the policy proposal.                                                                                                                                             | Policy instruction handout                              |
| Go over the perspectives jigsaw activity where students work to investigate the different perspectives given on the resource handout. Students then discuss their perspective with their group. See the handout for more details. | Resources handout, Perspectives Jigsaw Activity Handout |
| Students use the rest of the class time to work individually on their proposals, which can be done as homework if the teacher prefers.                                                                                            |                                                         |
