# Supplementary material for: Using Unplugged Computational Thinking to Scaffold Natural Selection Learning
Source: Oxford University Press journal article supplement (doi:10.1525/abt.2021.83.2.112), 2021-02-01
Supplement: lesson_8.zip [file lesson_8.zip]

## Description of Assigned Perspectives

| Perspective                                                                                                                                                                                                                                   | Resources                                                                                                                                                                                                                                                                                                                                                                                                                                                                                                                                                                                   |
|-----------------------------------------------------------------------------------------------------------------------------------------------------------------------------------------------------------------------------------------------|---------------------------------------------------------------------------------------------------------------------------------------------------------------------------------------------------------------------------------------------------------------------------------------------------------------------------------------------------------------------------------------------------------------------------------------------------------------------------------------------------------------------------------------------------------------------------------------------|
| <b>Epidemiological data:</b><br>Information and data related to the prevalence and effects of antibiotic resistant bacteria                                                                                                                   | <ul style="list-style-type: none"> <li>• <a href="http://www.nature.com/scitable/topicpage/antibiotic-resistance-mutation-rates-and-mrsa-28360">http://www.nature.com/scitable/topicpage/antibiotic-resistance-mutation-rates-and-mrsa-28360</a></li> <li>• <a href="http://www.cdc.gov/mrsa/tracking/index.html">http://www.cdc.gov/mrsa/tracking/index.html</a></li> <li>• <a href="http://www.cdc.gov/drugresistance/threat-report-2013/pdf/ar-threats-2013-508.pdf">http://www.cdc.gov/drugresistance/threat-report-2013/pdf/ar-threats-2013-508.pdf</a> (look at pp. 13-17)</li> </ul> |
| <b>Parental &amp; doctor concerns:</b><br>Most parents hate to see their children suffer so when children are sick, parents often want doctors to do anything possible (like prescribing medications) to ease the suffering.                  | <ul style="list-style-type: none"> <li>• <a href="http://survivorpediatrics.wordpress.com/2011/05/12/why-wasn%E2%80%99t-my-son-treated-with-antibiotics-for-his-red-ear/">http://survivorpediatrics.wordpress.com/2011/05/12/why-wasn%E2%80%99t-my-son-treated-with-antibiotics-for-his-red-ear/</a></li> <li>• <a href="http://www.kevinmd.com/blog/2010/11/antibiotics-controlled-substances-regulated.html">http://www.kevinmd.com/blog/2010/11/antibiotics-controlled-substances-regulated.html</a></li> </ul>                                                                          |
| <b>Use of antibiotics in international settings:</b><br>Health issues in the developing world create situations in which antibiotics are desperately needed, but in many places there are few guidelines for the distribution of antibiotics. | <ul style="list-style-type: none"> <li>• <a href="http://www.scidev.net/global/health/feature/antibiotic-resistance-and-the-developing-world.html">http://www.scidev.net/global/health/feature/antibiotic-resistance-and-the-developing-world.html</a></li> <li>• <a href="http://www.ncbi.nlm.nih.gov/pmc/articles/PMC1113834/">http://www.ncbi.nlm.nih.gov/pmc/articles/PMC1113834/</a> (focus on the summary points)</li> <li>• <a href="http://www.bmj.com/content/343/bmj.d6471">http://www.bmj.com/content/343/bmj.d6471</a></li> </ul>                                               |
| <b>Government intervention in healthcare issues:</b><br>Some people strongly oppose government policy or action in healthcare and argue that decision such as when to prescribe antibiotics should be left to doctors and patients.           | <ul style="list-style-type: none"> <li>• <a href="http://www.cnn.com/2009/HEALTH/08/04/time.line.healthcare/">http://www.cnn.com/2009/HEALTH/08/04/time.line.healthcare/</a></li> <li>• <a href="http://www.prnewswire.com/news-releases/americans-want-government-intervention-in-stopping-superbugs-135430938.html">http://www.prnewswire.com/news-releases/americans-want-government-intervention-in-stopping-superbugs-135430938.html</a></li> </ul>                                                                                                                                    |
| <b>Drug company perspectives on new antibiotics:</b><br>There are several factors working against the development of new antibiotics.                                                                                                         | <ul style="list-style-type: none"> <li>• <a href="http://www.dailyfinance.com/2009/10/16/antibiotic-resistance-why-big-pharma-cant-combat-our-second-wo/">http://www.dailyfinance.com/2009/10/16/antibiotic-resistance-why-big-pharma-cant-combat-our-second-wo/</a></li> <li>• <a href="http://www.microbemagazine.org/images/stories/arch2007/feb07/znw00207000056.pdf">http://www.microbemagazine.org/images/stories/arch2007/feb07/znw00207000056.pdf</a></li> </ul>                                                                                                                    |

You are responsible for reviewing information pertinent to your assigned perspective AND for sharing the basic ideas about this perspective with your group. The table above identifies the various perspectives as well as two resources for each perspective. You should review both of these resources and are welcome to seek information from other sources. Please note that all group members should review the epidemiological data. To support this process, you should prepare written responses to the following questions.

Group Discussion of the Responses:

1. What sources did you access? What is the quality of these sources?
2. Describe the aspect on AB-resistance you explored.
3. Who is involved with this aspect? What are their likely interests?
4. What would the stakeholders represented in your readings recommend in terms of policy for AB-resistance?
