# Supplementary material for: Using Unplugged Computational Thinking to Scaffold Natural Selection Learning
Source: Oxford University Press journal article supplement (doi:10.1525/abt.2021.83.2.112), 2021-02-01
Supplement: lesson_8.zip [file lesson_8.zip]

Archive with 4 entries (4 files):
- Policy Instructions.docx
- Resources Handout.pdf
- Lesson Plan 8.pdf
- Perspectives Jigsaw Activity.docx
