# Supplementary material for: Using Unplugged Computational Thinking to Scaffold Natural Selection Learning
Source: Oxford University Press journal article supplement (doi:10.1525/abt.2021.83.2.112), 2021-02-01
Supplement: lesson_8.zip [file lesson_8.zip › Perspectives Jigsaw Activity.docx]

**SSI Solution Statement: Policy Development & Analysis**

**Assignment Overview**

Throughout the rest of the Antibiotic Resistance unit, you will be asked to think about making a specific *policy recommendation* related to bacterial diseases and antibiotic resistance. A *policy recommendation is a suggested course of action* that could be implemented.

The purpose of this exercise is to get you thinking about what should be done (or not done) to deal with the problem of antibiotic resistance. This thinking should be informed by what you know about the science behind this issue, but your thinking may also be influenced by the social aspects of the issue. For this project, you will collaborate with classmates in small groups but you will be responsible for making your own policy recommendation and analysis of that recommendation.

As you review information about the issue and various perspectives on the issue, remember the importance of evaluating your sources of information.

**Process and Products**

1. Students are assigned to groups of ~4.
2. Everyone in the group should review resources that highlight epidemiological data related to antibiotic resistant bacteria. Then individual students will review a couple resources that present information and perspectives about a particular aspect of the AB-resistance issue:
   1. Parental and doctor concerns
   2. Use of antibiotics in international settings
   3. Government intervention in healthcare issues (like AB-resistance)
   4. Drug company perspectives on new antibiotics.
3. Each group member is responsible for reviewing information pertinent to her/his assigned perspective AND for sharing the basic ideas about this perspective with her/his group. Each student should be prepared to share information corresponding to the discussion questions (shown in #4).
4. Group discussion. Students should present the information they find relative to each aspect.
   1. What sources did you access? What is the quality of these sources?
   2. Describe the aspect on AB-resistance you explored.
   3. Who is involved with this aspect? What are their likely interests?
   4. What would the stakeholders represented in your readings recommend in terms of policy for AB-resistance?

After presenting information about the various aspects, the groups should brainstorm possible courses of action that could serve as the basis for a policy recommendation.

1. Individual students select a governmental level for policy enactment and create a policy recommendation.
2. Individual students fill out the outline and present proposals to small groups of students. Presentations will be evaluated by these groups, and outlines will be turned in.
