# Supplementary material for: Using Unplugged Computational Thinking to Scaffold Natural Selection Learning
Source: Oxford University Press journal article supplement (doi:10.1525/abt.2021.83.2.112), 2021-02-01
Supplement: lesson_8.zip [file lesson_8.zip › Policy Instructions.docx]

**Honors Biology Name:**

**Unit 6 Assessment**

The purpose of this assessment is to get you thinking about what should be done (or not done) to deal with the problem of antibiotic resistance. This thinking should be informed by what you know about the science behind this issue, but will also be influenced by the social aspects of the issue.

**Prompt:**

**Evaluate the social and scientific issues related to antibiotic resistance and present a proposed course of action to address this growing problem.**

**Requirements:**

- Final product will be a presentation (approx. 5 mins) that includes:
  - A proposed course of action with initial rationale (thesis)
  - Description of evidence and reasoning to support the proposal
  - Appropriate visual aids
- Annotated Bibliography submitted at time of presentation
- Detailed outline of your presentation submitted at the time of presentation
- Due Date: ____________

**Questions to consider for your proposal:**

- What would implementation of the proposal likely accomplish?
- Why would this intended outcome be a desirable result?
- What are the potential downsides or negative consequences associated with enactment of your proposal?
- If this is a good solution to the problem of AB-resistance, why has it not already been implemented?
- In what ways is your policy aligned with the science of the issue?
- Are there gaps in our current scientific knowledge that could potentially influence the implementation of your proposal or its impacts?
- Which groups would likely be in favor of your proposal? Why?
- Which groups would likely oppose your proposal? Why?
- Are there groups interested in the issue of antibiotic resistance but not affected by your proposal?

| **Category** | | **4** | **3** | **2** | **1** |
| --- | --- | --- | --- | --- | --- |
| **Thesis** | | Thesis fully addresses the prompt by making a precise claim and provides controlled and thoughtful reasoning for the claim. | Thesis fully addresses the prompt by making a claim and provides logical reasoning for the claim. | Thesis fully addresses the prompt by making a claim and provides reasoning that may be too narrow, superficial, and/or vague. | Thesis responds partially to the prompt with a claim that is vague, incomplete, or lacks reasoning. |
| **Description** | | Clearly and thoroughly integrates specific, relevant, and accurate evidence, creating a strong foundation for the argument. | Integrates specific, relevant, and accurate evidence, creating a foundation for the argument. | Integrates limited and/or general evidence; may lack relevance and/or accuracy; creating a weak foundation for the argument. | Attempts to integrate evidence, but is insufficient in creating a foundation for the argument. |
| **Reasoning** | **Analysis** | Clearly and efficiently breaks down and elaborates on meaning and significance of each piece of evidence. | Breaks down and elaborates on meaning and significance of each piece of evidence. | Breaks down evidence but provides limited meaning and significance. | Breaks down evidence in a confusing or incomplete manner. |
| **Synthesis** | Clearly and efficiently connects the evidence and analysis to the thesis to develop the implications and significance. | Connects the evidence and analysis to the thesis to develop the implications and significance. | Attempts to connect the evidence and analysis to the thesis, but implications and significance are limited. | There is little to no development of implications and significance of evidence and analysis to the thesis. |
| **Evaluation** | Clearly supports argument by making a reasoned judgment based upon thorough examination of multiple perspectives. | Supports argument by making a reasoned judgment based upon examination of multiple perspectives. | Attempts to support argument by making a judgment based upon limited examination of perspectives. | Does not make sufficient judgment to support the argument. Little to no consideration of other perspectives. |
| **Communication** | | Language skills are above average. Demonstrates professionalism and fluency, and is engaging to the audience. | Language skills are average. Demonstrates average professionalism and fluency, and I am engaging to the audience. | Language skills are inconsistent. Attempts to be professional and fluent, but I may not consistently engage the audience. | Language skills are lacking. Demonstrates a deficiency in being professional and fluent, and I am largely disengaging to the audience. |
