# Supplementary material for: Using Unplugged Computational Thinking to Scaffold Natural Selection Learning
Source: Oxford University Press journal article supplement (doi:10.1525/abt.2021.83.2.112), 2021-02-01
Supplement: lesson_9.zip [file lesson_9.zip]

## **Lesson Plan 9: Summative Assessments**

**Time: 90 min**

### **Goals for the lesson:**

- Students use evidence from the lesson investigations and individual research to propose and present a policy for mitigating antibiotic resistance.

### **Lesson assessments:**

- Students' proposal outlines and presentations serve as one summative assessment for the unit. See the rubric attached to the policy instructions handout.
- Students can take a content summative assessment, as desired by the teacher. In our implementation of this unit, the test included a final algorithmic explanation of natural selection.

### **Resources/Materials:**

- Policy instructions handout (rubric)
- Algorithm handout
- Teacher provides content test, if desired.

### **Instructional sequence**

| <b>Learning Activity</b>                                                                                                                                                                                                  | <b>Materials/Supplies</b> |
|---------------------------------------------------------------------------------------------------------------------------------------------------------------------------------------------------------------------------|---------------------------|
| Students turn in their proposal outlines and present their proposals. This can be done in small groups, or to the entire class, depending on teacher preference.                                                          |                           |
| Students take the summative content assessment (not provided here, depends on teacher implementing the lesson). Students create a final algorithmic explanation of natural selection as part of the summative assessment. | Algorithm handout         |
